# Supplementary material
Source: HighWire-hosted journal article supplement (https://erj.ersjournals.com/highwire/filestream/113140/field_highwire_adjunct_files/0/SUPPLEMENTARY_APPENDIX.pdf)
Supplement: SUPPLEMENTARY_APPENDIX.pdf [file SUPPLEMENTARY_APPENDIX.pdf]

## **SUPPLEMENTARY APPENDIX**

### **Respiratory Symptoms Form (RSF)**

#### **SECTION A: Wheezing and asthma**

1. Have you (has your child) ever had wheezing or whistling in the chest at any time in the past? ["NO" = 0, "YES" = 1, "NA" = 9][If "NO", go to question 2].
  - a. Have you (has your child) had wheezing or whistling in the chest in the past 12 months? ["NO" = 0, "YES" = 1, "NA" = 9]
  - b. In the past 12 months, how many attacks of wheezing have you (has your child) had? ["1 – 3 attacks" = 1, "4 – 12 attacks" = 2, "12 or more attacks" = 3, "NA"=9].
  - c. In the past 12 months, have you (your child) ever had a wheezing attack that made you (your child) feel short of breath?  
["NO" = 0, "YES" = 1, "NA" = 9]
  - d. In the past 12 months, how many nights in a week, on average, has your (your child's) sleep been disturbed due to wheezing or whistling?  
["NO" = 0, "YES" = 1, "NA" = 9]
  - e. In the past 12 months, has wheezing ever been severe enough to limit your (your child's) speech to only one or two words at a time between breaths?  
["NO" = 0, "YES" = 1, "NA" = 9]
2. Have you (has your child) ever had asthma? ["NO" = 0, "YES" = 1, "NA" = 9][If "NO", go to question 3].
  - a. Has a doctor or health worker ever told you that you have (your child has) asthma?  
["NO" = 0, "YES" = 1, "NA" = 9]
  - b. At what age did your (your child's) asthma start?
  - c. Do you (your child) still have asthma?  
["NO" = 0, "YES" = 1, "NA" = 9]
  - d. At what age did your (your child's) asthma stop?
3. In the past 12 months, have you (has your child) had a dry cough at night, apart from a cough associated with a cold or chest infection? ["NO" = 0, "YES" = 1, "NA" = 9]

#### **SECTION B: Cough and phlegm**

4. Do you (does your child) usually cough? (usually means more than half the time or "more than normal") ["NO" = 0, "YES" = 1, "NA" = 9] [If "NO", go to question 5].

- a. Do you (does your child) cough as much as 4 to 6 times a day on 4 or more days out of a week?  
[“NO” = 0, “YES” = 1, “NA” = 9]
  - b. Do you (does your child) usually cough like this on most days for 3 consecutive months or more during the last two years? (Most days means  $\geq 15$  days in a month)
  - c. For how many years have you (has your child) had this cough?
5. Do you (does your child) usually bring up phlegm from your (your child's) chest? (Exclude phlegm from the nose. Count swallowed phlegm). [“NO” = 0, “YES” = 1, “NA” = 9] [If “NO”, go to question 6].
- a. Do you (does your child) usually bring up phlegm like this as much as twice a day on 4 or more days out of the week? [“NO” = 0, “YES” = 1, “NA” = 9].
  - b. Do you (does your child) bring up phlegm like this on most days for 3 consecutive months or more during the last two years?  
[“NO” = 0, “YES” = 1, “NA” = 9]
  - c. For how many years have you (your child) had phlegm?  
[“NO” = 0, “YES” = 1, “NA” = 9]

### SECTION C: Chest colds and chest-illness

6. When you/your child get a cold, does it usually attack your chest?  
[“NO” = 0, “YES” = 1, “NA” = 9]
7. During the past 3 years, have you/your child had any chest illnesses that have kept you/your child off work, indoors at home, or in bed? [“NO” = 0, “YES” = 1, “NA” = 9][If “NO” stop].
- a. Did you (your child) produce phlegm with any of these chest illnesses?  
[“NO” = 0, “YES” = 1, “NA” = 9]
  - b. In the last 3 years, how many such illnesses with (increased) phlegm did you (your child) have which lasted a week or more?

### SUPPLEMENTARY TABLES

**ETABLE 1.** Crude number of responses or means (SD), regardless of ward, for the 3879 children who responded to the respiratory survey, stratified by supplement assignment group; NNIPS-1 follow-up study, Nepal, 2006 – 2008.

|                    | Supplement assignment after birth |           |
|--------------------|-----------------------------------|-----------|
|                    | Placebo                           | Vitamin A |
| <b>Sample size</b> | 1824                              | 2055      |

|                                          |                                                                  |            |            |
|------------------------------------------|------------------------------------------------------------------|------------|------------|
| <b>SES (n/N)</b>                         |                                                                  |            |            |
|                                          | Lower caste                                                      | 1465/1819  | 1600/2044  |
|                                          | Land ownership                                                   | 1505/1815  | 1701/2042  |
|                                          | Owens livestock                                                  | 1634/1819  | 1780/2043  |
|                                          | Owens radio                                                      | 877/1814   | 918/2043   |
|                                          | House without roof or with a thatch roof                         | 682/1822   | 844/2052   |
|                                          | House without walls or thatch-made walls                         | 1474/1822  | 1542/2052  |
|                                          | Maternal literacy                                                | 164/1817   | 198/2047   |
|                                          | Father is farmer                                                 | 1316/1822  | 1319/2052  |
| <b>Asthma prevalence (n/N)</b>           |                                                                  |            |            |
|                                          | Lifetime asthma (self-report)                                    | 29/1821    | 46/2053    |
|                                          | Physician diagnosis of asthma                                    | 12/1819    | 12/2052    |
|                                          | Mean age in years (SD of means) at the onset of asthma           | 11.0 (6.6) | 11.3 (7.6) |
|                                          | Current asthma (self-report)                                     | 14/1821    | 17/2053    |
| <b>Wheezing prevalence (n/N)</b>         |                                                                  |            |            |
|                                          | Lifetime wheeze                                                  | 191/1818   | 257/2044   |
|                                          | Wheezing in the past year                                        | 116/1817   | 138/2035   |
|                                          | Wheezing attacks in the past year                                |            |            |
|                                          | 1 – 3                                                            | 57/1817    | 80/2035    |
|                                          | 4 – 12                                                           | 40/1817    | 42/2035    |
|                                          | 12 or more                                                       | 19/1817    | 16/2035    |
|                                          | Wheezing accompanied by shortness of breath in the past year     | 54/1744    | 76/1923    |
|                                          | Disturbed sleep from wheezing in the past year                   |            |            |
|                                          | Less than 1 night a week                                         | 24/1735    | 30/1920    |
|                                          | More than 1 night a week                                         | 30/1735    | 29/1920    |
| <b>Cough and phlegm prevalence (n/N)</b> |                                                                  |            |            |
|                                          | Persistent cough (coughs more than normal)                       | 125/1823   | 150/2055   |
|                                          | Chronic cough (3 months of consecutive cough in a 2 year period) | 48/1819    | 50/2051    |

|  |                                                                               |           |           |
|--|-------------------------------------------------------------------------------|-----------|-----------|
|  | Average number of years (SD) with cough                                       | 2.8 (3.1) | 3.7 (4.8) |
|  | Persistent phlegm (produces phlegm more than normal)                          | 233/1823  | 223/2055  |
|  | Chronic phlegm (3 months of consecutive phlegm production in a 2 year period) | 75/1822   | 75/2052   |
|  | Chronic productive cough                                                      | 22/1823   | 21/2055   |
|  | Dry cough at night in the past year                                           | 104/1821  | 125/2053  |
|  | Average number of years (SD) with phlegm                                      | 2.4 (3.0) | 2.8 (3.6) |
|  | Chest-illnesses after colds                                                   | 430/1814  | 517/2049  |
|  | Mean number of phlegm episodes (SD) with chest illness                        | 2.5 (3.7) | 2.5 (2.6) |

**ETABLE 2.** Crude number of responses or means (SD), regardless of ward, for the 1551 children who responded to the respiratory survey, stratified by supplement assignment group; NNIPS-2 follow-up study, Nepal, 2006 – 2008.

|                                  |                                                          | <b>Supplement assignment after birth</b> |                |                  |
|----------------------------------|----------------------------------------------------------|------------------------------------------|----------------|------------------|
|                                  |                                                          | <b>Beta-carotene</b>                     | <b>Placebo</b> | <b>Vitamin A</b> |
| <b>Sample size</b>               |                                                          | 539                                      | 476            | 536              |
| <b>SES (n/N)</b>                 |                                                          |                                          |                |                  |
|                                  | Lower caste                                              | 454/538                                  | 438/476        | 482/536          |
|                                  | Land ownership                                           | 371/536                                  | 373/475        | 365/536          |
|                                  | Owens livestock                                          | 452/538                                  | 414/476        | 463/536          |
|                                  | Owens radio                                              | 162/538                                  | 133/476        | 150/536          |
|                                  | House without roof or with a thatch roof                 | 122/513                                  | 88/456         | 144/503          |
|                                  | House without walls or thatch-made walls                 | 463/513                                  | 436/456        | 464/503          |
|                                  | Maternal literacy                                        | 106/513                                  | 42/456         | 58/503           |
|                                  | Father is farmer                                         | 255/509                                  | 260/455        | 223/500          |
| <b>Asthma prevalence (n/N)</b>   |                                                          |                                          |                |                  |
|                                  | Lifetime asthma (self-report)                            | 4/536                                    | 2/476          | 7/534            |
|                                  | Physician diagnosis of asthma                            | 0/536                                    | 1/476          | 1/533            |
|                                  | Mean age in years (SD of means) at the time of diagnosis | 2.50 (2.38)                              | 0 (0)          | 2.71 (3.95)      |
|                                  | Current asthma (self-report)                             | 1/536                                    | 0/476          | 4/534            |
| <b>Wheezing prevalence (n/N)</b> |                                                          |                                          |                |                  |
|                                  | Lifetime wheeze                                          | 82/531                                   | 77/472         | 81/525           |
|                                  | Wheezing in the past year                                | 29/527                                   | 17/471         | 27/524           |
|                                  | Wheezing attacks in the past year                        |                                          |                |                  |
|                                  | 1 – 3                                                    | 18/527                                   | 8/471          | 15/524           |
|                                  | 4 – 12                                                   | 7/527                                    | 5/471          | 5/524            |
|                                  | 12 or more                                               | 4/527                                    | 4/471          | 7/524            |

|                                          |                                                                               |             |             |             |
|------------------------------------------|-------------------------------------------------------------------------------|-------------|-------------|-------------|
|                                          | Wheezing accompanied by shortness of breath in the past year                  | 12/475      | 7/412       | 15/471      |
|                                          | Disturbed sleep from wheezing in the past                                     |             |             |             |
|                                          | Less than 1 night a week                                                      | 7/476       | 2/411       | 3/467       |
|                                          | More than 1 night a week                                                      | 10/476      | 5/411       | 7/467       |
| <b>Cough and phlegm prevalence (n/N)</b> |                                                                               |             |             |             |
|                                          | Persistent cough (coughs more than normal)                                    | 29/538      | 15/475      | 24/536      |
|                                          | Chronic cough (3 months of consecutive cough in a 2-year period)              | 7/535       | 6/473       | 6/534       |
|                                          | Average number of years (SD) with cough                                       | 2.40 (3.01) | 2.83 (2.44) | 0.71 (1.15) |
|                                          | Persistent phlegm (produces phlegm more than once a week)                     | 37/538      | 15/475      | 31/534      |
|                                          | Chronic phlegm (3 months of consecutive phlegm production in a 2-year period) | 12/537      | 2/474       | 6/529       |
|                                          | Chronic productive cough                                                      | 3/538       | 1/475       | 0/536       |
|                                          | Dry cough at night in the past year                                           | 20/536      | 13/475      | 20/535      |
|                                          | Average number of years (SD) with phlegm                                      | 2.26 (2.85) | 1.46 (1.85) | 1.54 (2.48) |
|                                          | Chest-illnesses after colds                                                   | 121/536     | 105/469     | 106/529     |
|                                          | Mean number of phlegm episodes (SD) with chest-illnesses after colds          | 2.67 (2.35) | 0.33 (0.58) | 0.62 (1.06) |

**ETABLE 3.** Effects of supplementation assignment on spirometric indicators of obstruction in 3075 children adjusted by multiple variables; NNIPS-1 follow-up study, Nepal, 2006 – 2008.

|                             |                                          | Supplement assignment after birth |              |             |
|-----------------------------|------------------------------------------|-----------------------------------|--------------|-------------|
|                             |                                          | Placebo                           | Vitamin A    | GEE p-value |
| <b>Sample size for boys</b> |                                          |                                   |              |             |
|                             | Number of boys                           | 804                               | 934          |             |
|                             | Median (range) number of boys per ward   | 35.5 (12–76)                      | 40.5 (9–112) |             |
| <b>FEV1/FVC for boys</b>    |                                          |                                   |              |             |
|                             | Average (SD) of FEV1/FVC (%)             | 85.9 (6.1)                        | 86.1 (5.8)   |             |
|                             | Ward means (SD of means) of FEV1/FVC (%) | 85.7 (1.4)                        | 86.1 (1.0)   | 0.56        |
| <b>PEF for boys</b>         |                                          |                                   |              |             |
|                             | Average (SD) of PEF (L/s)                | 7.81 (1.69)                       | 7.85 (1.56)  |             |
|                             | Ward means (SD of means) of PEF (L/s)    | 7.67 (0.67)                       | 7.80 (0.33)  | 0.94        |

|                                      |                                                       |             |             |      |
|--------------------------------------|-------------------------------------------------------|-------------|-------------|------|
| <b>FEF75 for boys</b>                |                                                       |             |             |      |
|                                      | Average (SD) of FEF75 (L/s)                           | 1.77 (0.63) | 1.80 (0.63) |      |
|                                      | Ward means (SD of means) of FEF75 (L/s)               | 1.74 (0.19) | 1.79 (0.13) | 0.77 |
| <b>MMEF for boys</b>                 |                                                       |             |             |      |
|                                      | Average (SD) of MMEF (L/s)                            | 3.66 (0.96) | 3.69 (0.95) |      |
|                                      | Ward means (SD of means) of MMEF (L/s)                | 3.60 (0.32) | 3.67 (0.16) | 0.97 |
| <b>Sample size for girls</b>         |                                                       |             |             |      |
|                                      | Number of girls                                       | 629         | 708         |      |
|                                      | Median (range) number of girls per ward               | 30 (4–67)   | 26.5 (6–97) |      |
| <b>FEV<sub>1</sub>/FVC for girls</b> |                                                       |             |             |      |
|                                      | Average (SD) of FEV <sub>1</sub> /FVC (%)             | 87.4 (5.6)  | 87.2 (5.9)  |      |
|                                      | Ward means (SD of means) of FEV <sub>1</sub> /FVC (%) | 87.6 (1.3)  | 87.1 (1.4)  | 0.55 |
| <b>PEF for girls</b>                 |                                                       |             |             |      |
|                                      | Average (SD) of PEF (L/s)                             | 5.53 (1.11) | 5.61 (1.13) |      |
|                                      | Ward means (SD of means) of PEF (L/s)                 | 5.46 (0.33) | 5.48 (0.45) | 0.99 |
| <b>FEF75 for girls</b>               |                                                       |             |             |      |
|                                      | Average (SD) of FEF75 (L/s)                           | 1.39 (0.49) | 1.39 (0.51) |      |
|                                      | Ward means (SD of means) of FEF75 (L/s)               | 1.37 (0.16) | 1.35 (0.17) | 0.43 |
| <b>MMEF for girls</b>                |                                                       |             |             |      |
|                                      | Average (SD) of MMEF (L/s)                            | 2.93 (0.73) | 2.95 (0.75) |      |
|                                      | Ward means (SD of means) of MMEF (L/s)                | 2.88 (0.26) | 2.89 (0.28) | 0.71 |

**ETABLE 4.** Effects of supplementation assignment on spirometric indicators of obstruction in 1322 children adjusted by multiple variables; NNIPS-2 follow-up study, Nepal, 2006 – 2008.

|                             |                | <b>Supplement assignment after birth</b> |                |                |                    |
|-----------------------------|----------------|------------------------------------------|----------------|----------------|--------------------|
|                             |                | <b>Beta-carotene</b>                     | <b>Placebo</b> | <b>p-value</b> | <b>GEE p-value</b> |
| <b>Sample size for boys</b> |                |                                          |                |                |                    |
|                             | Number of boys | 254                                      | 202            | 226            |                    |

|                              |                                          |             |             |             |      |
|------------------------------|------------------------------------------|-------------|-------------|-------------|------|
|                              | Median (range) number of boys per ward   | 25 (14–44)  | 22 (9–45)   | 19 (5–70)   |      |
| <b>FEV1/FVC for boys</b>     |                                          |             |             |             |      |
|                              | Average (SD) of FEV1/FVC                 | 87.5 (7.1)  | 87.6 (6.1)  | 87.8 (6.0)  |      |
|                              | Ward means (SD of means) of FEV1/FVC     | 87.6 (1.3)  | 87.5 (1.8)  | 88.1 (1.2)  | 0.94 |
| <b>PEF for boys</b>          |                                          |             |             |             |      |
|                              | Average (SD) of PEF (L/s)                | 3.66 (0.91) | 3.78 (0.82) | 3.79 (0.75) |      |
|                              | Ward means (SD of means) of PEF (L/s)    | 3.69 (0.19) | 3.91 (0.33) | 3.86 (0.23) | 0.38 |
| <b>FEF75 for boys</b>        |                                          |             |             |             |      |
|                              | Average (SD) of FEF75 (L/s)              | 0.86 (0.34) | 0.83 (0.30) | 0.89 (0.33) |      |
|                              | Ward means (SD of means) of FEF75 (L/s)  | 0.87 (0.07) | 0.83 (0.06) | 0.89 (0.06) | 0.11 |
| <b>MMEF for boys</b>         |                                          |             |             |             |      |
|                              | Average (SD) of MMEF (L/s)               | 1.93 (0.59) | 1.92 (0.52) | 1.98 (0.53) |      |
|                              | Ward means (SD of means) of MMEF (L/s)   | 1.94 (0.13) | 1.95 (0.13) | 2.01 (0.14) | 0.52 |
| <b>Sample size for girls</b> |                                          |             |             |             |      |
|                              | Number of girls                          | 209         | 217         | 214         |      |
|                              | Median (range) number of girls per ward  | 22 (12–47)  | 26 (7–45)   | 19 (6–55)   |      |
| <b>FEV1/FVC for girls</b>    |                                          |             |             |             |      |
|                              | Average (SD) of FEV1/FVC (%)             | 89.1 (6.6)  | 88.9 (6.8)  | 89.4 (6.1)  |      |
|                              | Ward means (SD of means) of FEV1/FVC (%) | 89.0 (2.2)  | 88.7 (1.6)  | 89.4 (2.2)  | 0.64 |
| <b>PEF for girls</b>         |                                          |             |             |             |      |

|                        |                                           |                |             |                |      |
|------------------------|-------------------------------------------|----------------|-------------|----------------|------|
|                        | Average (SD) of PEF (L/s)                 | 3.45<br>(0.79) | 3.50 (0.88) | 3.49<br>(0.74) |      |
|                        | Ward means (SD of means) of PEF (L/s)     | 3.44<br>(0.30) | 3.61 (0.47) | 3.47<br>(0.19) | 0.78 |
| <b>FEF75 for girls</b> |                                           |                |             |                |      |
|                        | Average (SD) of FEF75 (L/s)               | 0.85<br>(0.34) | 0.81 (0.32) | 0.85<br>(0.32) |      |
|                        | Ward means (SD of means) of FEF75 (L/s)   | 0.84<br>(0.12) | 0.84 (0.13) | 0.86<br>(0.12) | 0.19 |
| <b>MMEF for girls</b>  |                                           |                |             |                |      |
|                        | Average (SD) of MMEF (L/s)                | 1.90<br>(0.55) | 1.86 (0.57) | 1.93<br>(0.51) |      |
|                        | Ward means (SD of means) of MMEF<br>(L/s) | 1.89<br>(0.21) | 1.90 (0.23) | 1.93<br>(0.16) | 0.20 |
